# Supplementary material
Source: Royal Society of Chemistry journal article supplement (doi:10.1039/d6tb00752j)
Supplement: d6tb00752j1.pdf [file d6tb00752j1.pdf]

Supporting Information

**Coumarin-Tethered 1,2,3-Triazole Based Fluorescent “Turn-ON” Probe via Metal-Free Click Chemistry for Selective Sensing of Serum Albumin: Quantitative Detection of HSA in Urine**

Juheli Sadhukhan, Pabitra Mandal, Susanta Sekhar Adhikari\*, Smritimoy Pramanik\*

Department of Chemistry, University of Calcutta, 92 A.P.C. Road, Kolkata 700 009, India

\*Corresponding author E-mail: [adhikarisusanta@yahoo.com/](mailto:adhikarisusanta@yahoo.com/) [ssachem@caluniv.ac.in](mailto:ssachem@caluniv.ac.in),  
[spchem@caluniv.ac.in](mailto:spchem@caluniv.ac.in)

| Sl. No. | Content                                                                                                                                | Page No.       |
|---------|----------------------------------------------------------------------------------------------------------------------------------------|----------------|
| 1.      | <sup>1</sup> H and <sup>13</sup> C NMR of compounds <b>1</b> and ( <b>3a-g</b> )                                                       | SI-2 to SI-9   |
| 2.      | Photophysical studies of compound ( <b>3a-e</b> ) and <b>3g</b>                                                                        | SI-10          |
| 3.      | Absorbance Spectra of compounds ( <b>3a-e</b> ) and <b>3g</b>                                                                          | SI-11          |
| 4.      | Emission Spectra of compounds ( <b>3a-e</b> ) and <b>3g</b>                                                                            | SI-12          |
| 5.      | Estimation of the binding constants of ( <b>3a-e</b> ) and <b>3g</b>                                                                   | SI-13          |
| 6.      | pH sensitivity of the probe <b>3f</b>                                                                                                  | SI-14          |
| 7.      | Limit of detection of probe <b>3f</b> for BSA and HAS sensing                                                                          | SI-14 to SI-15 |
| 8.      | Table S1 for comparison with other small-molecule TICT-based probes for the detection of human serum albumins                          | SI-15 to SI-17 |
| 9.      | Micropolarity Analysis of Probe <b>3f</b> within the Protein Binding Pocket                                                            | SI-18          |
| 10.     | Job's plot of <b>3f</b> for BSA and HSA                                                                                                | SI-18          |
| 11.     | Table S2 for Time-resolved fluorescence analysis decay parameters of <b>3f</b> in the absence and presence of BSA and HSA              | SI-19          |
| 12.     | Table S3 for Secondary structure analysis (infrared spectra) for the free BSA and HSA and their corresponding complexes with <b>3f</b> | SI-19          |
| 13.     | Table S4 for Comparison of $\alpha$ -helix content from FT-IR and CD spectroscopy                                                      | SI-20          |
| 14.     | Site Marker study for BSA and HSA                                                                                                      | SI-20          |
| 15.     | Molecular Docking Study                                                                                                                | SI-21          |
| 16.     | Table S5 for the amino acid residue involved in the ligand-protein interaction and free binding energy                                 | SI-22          |
| 17.     | HSA detection in a real urine sample and paper strip experiment                                                                        | SI-23          |

# 1. $^1\text{H}$ and $^{13}\text{C}$ NMR of compounds

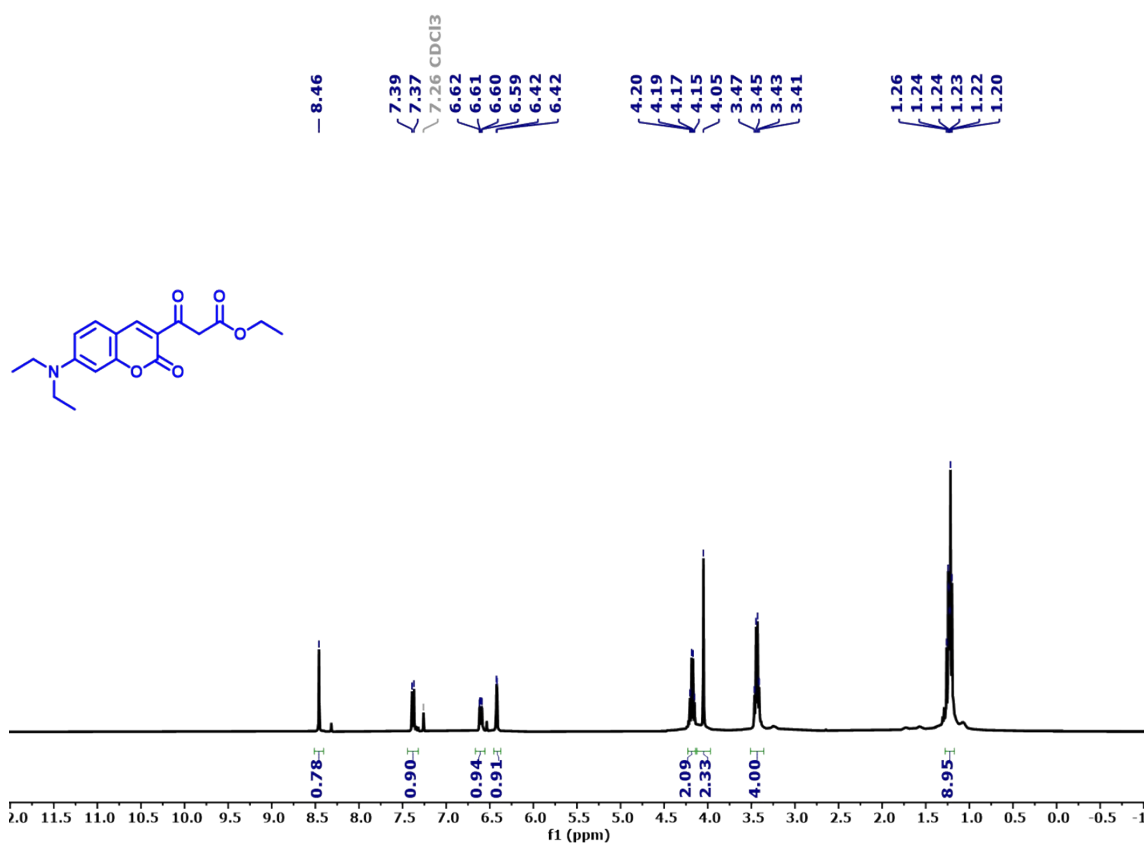

Fig. S1.  $^1\text{H}$  NMR of compound 1 in  $\text{CDCl}_3$  (400 MHz)

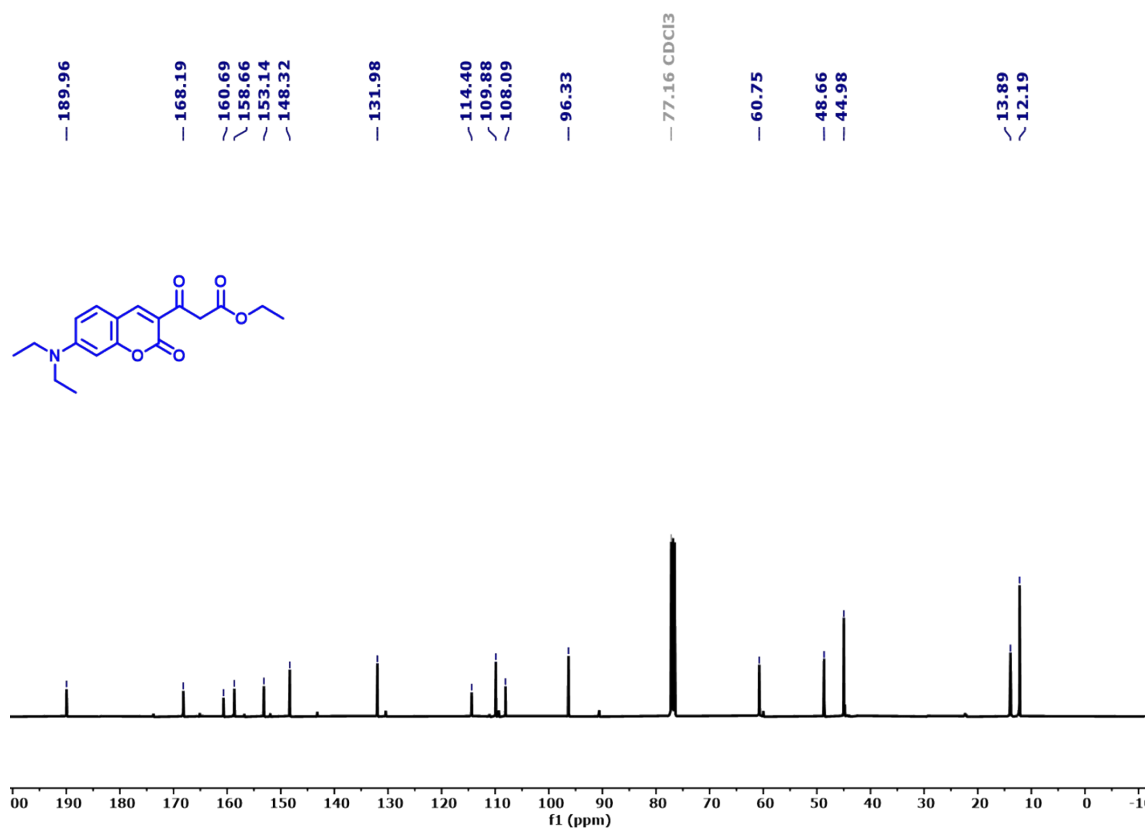

Fig. S2.  $^{13}\text{C}$  NMR of compound 1 in  $\text{CDCl}_3$  (100 MHz)

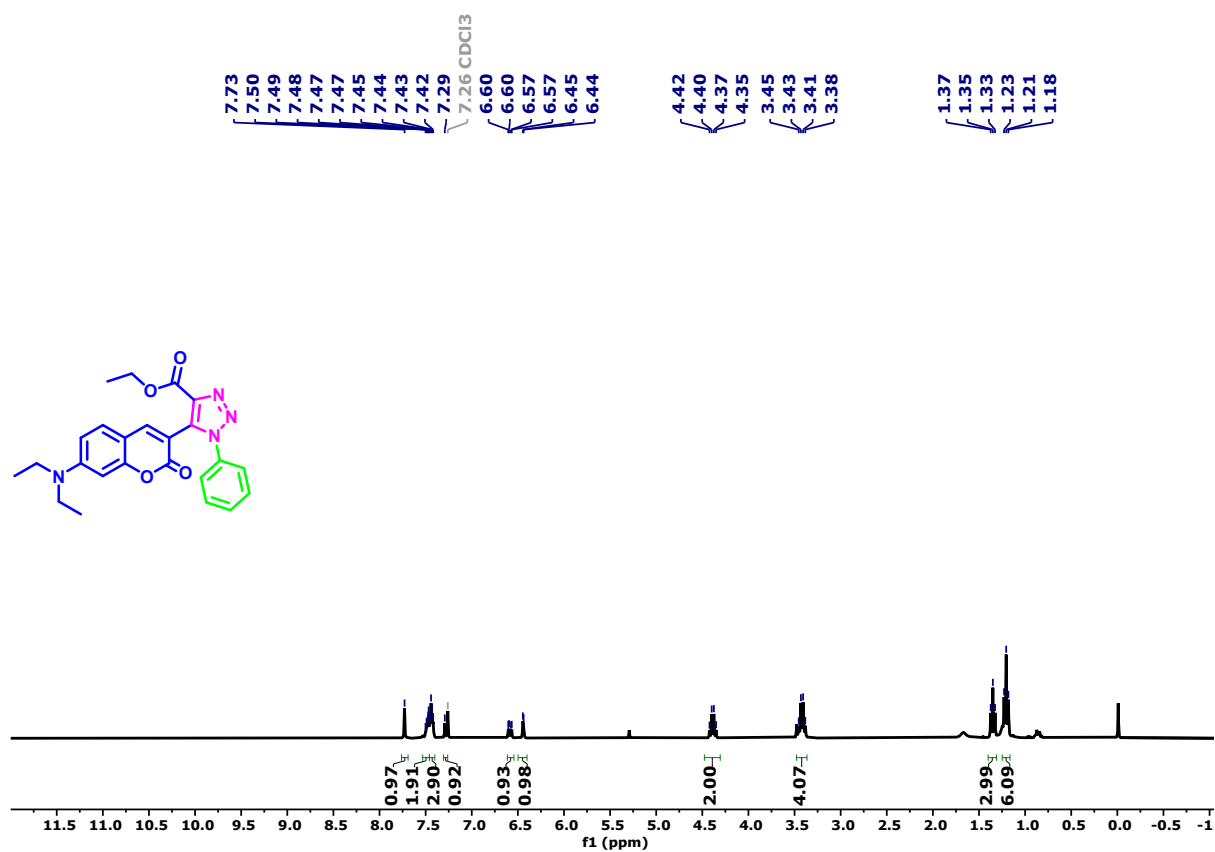

Fig. S3. <sup>1</sup>H NMR of compound **3a** in CDCl<sub>3</sub> (300 MHz)

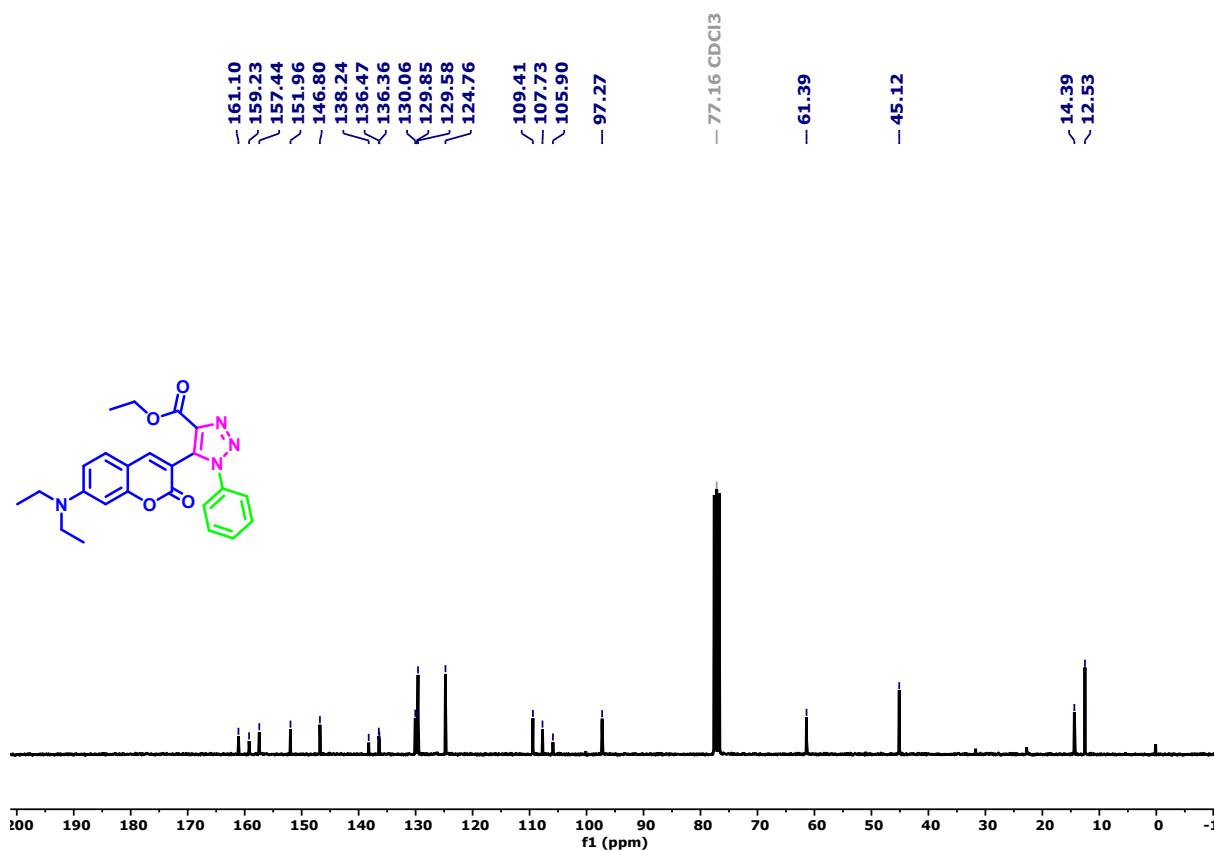

Fig. S4. <sup>13</sup>C NMR of compound **3a** in CDCl<sub>3</sub> (75 MHz)

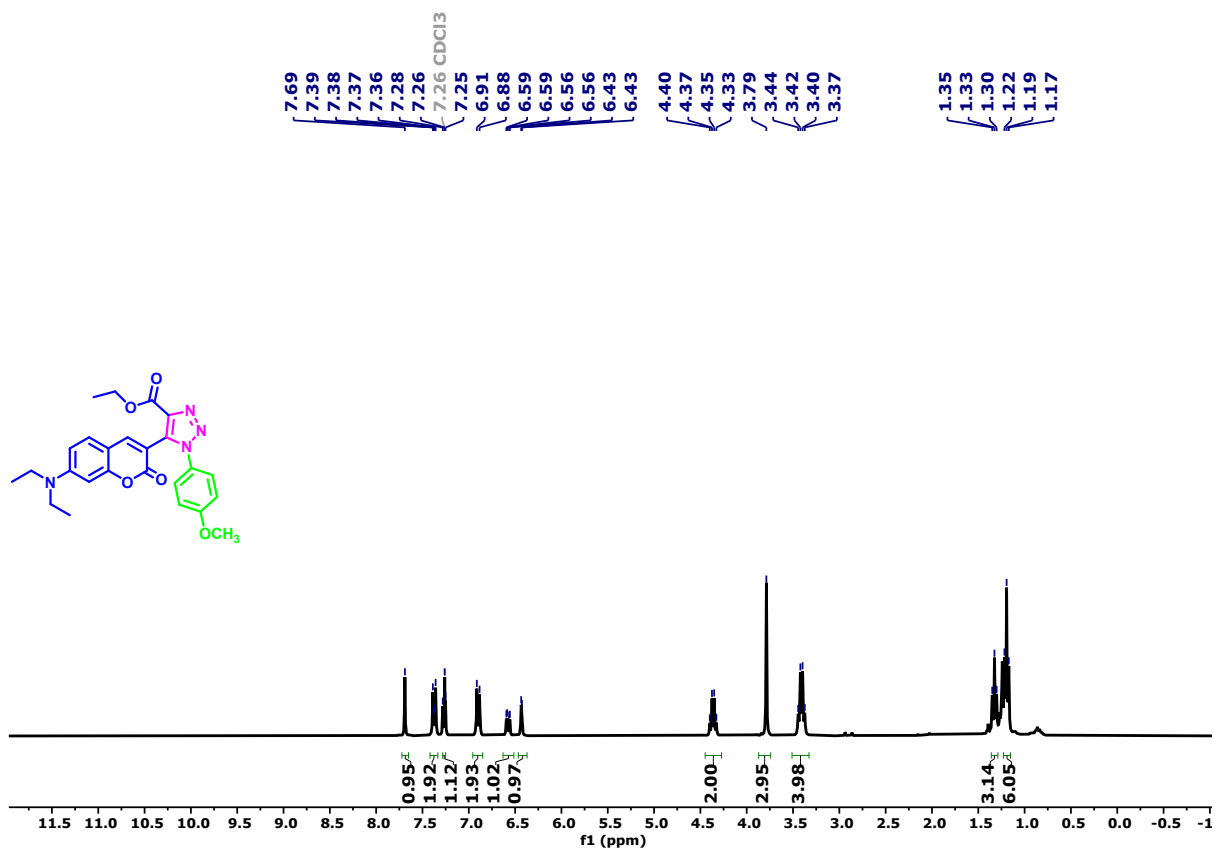

Fig. S5. <sup>1</sup>H NMR of compound **3b** in CDCl<sub>3</sub> (300 MHz)

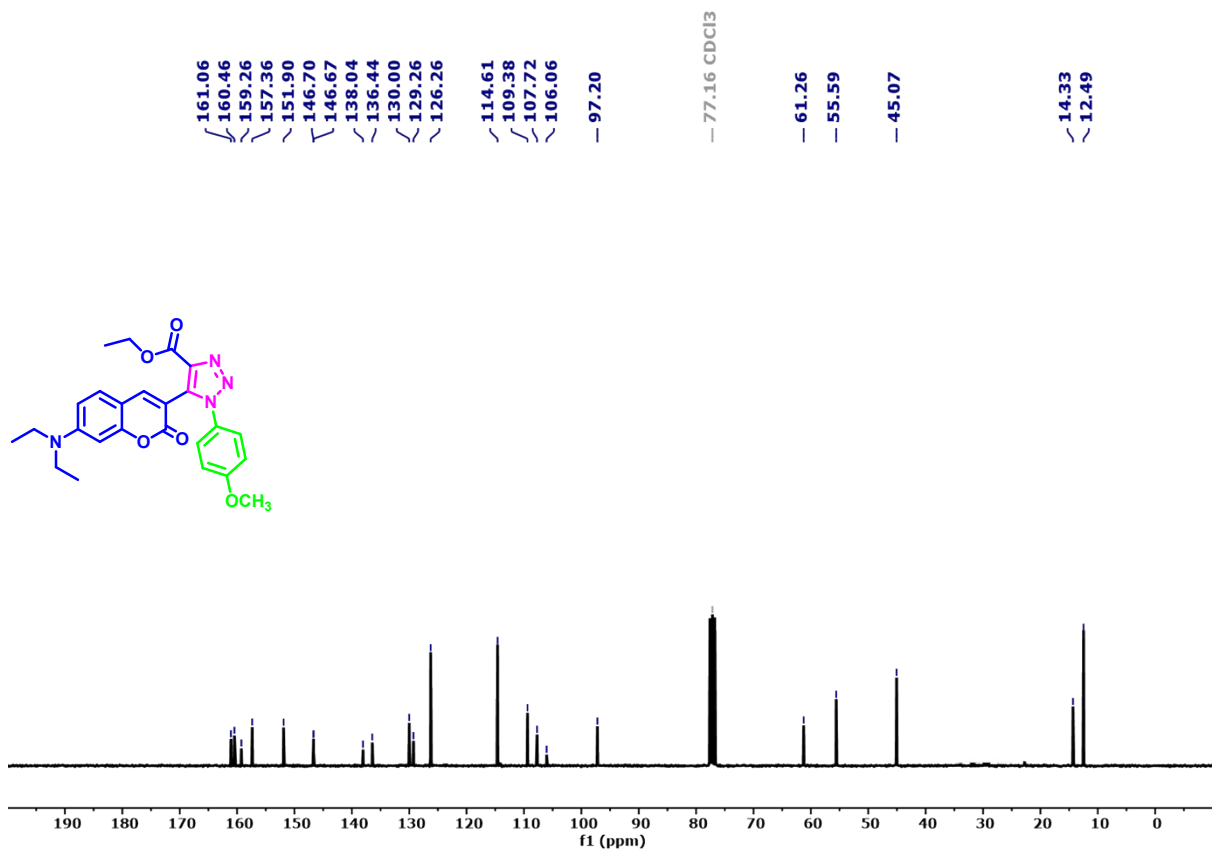

Fig. S6. <sup>13</sup>C NMR of compound **3b** in CDCl<sub>3</sub> (75 MHz)

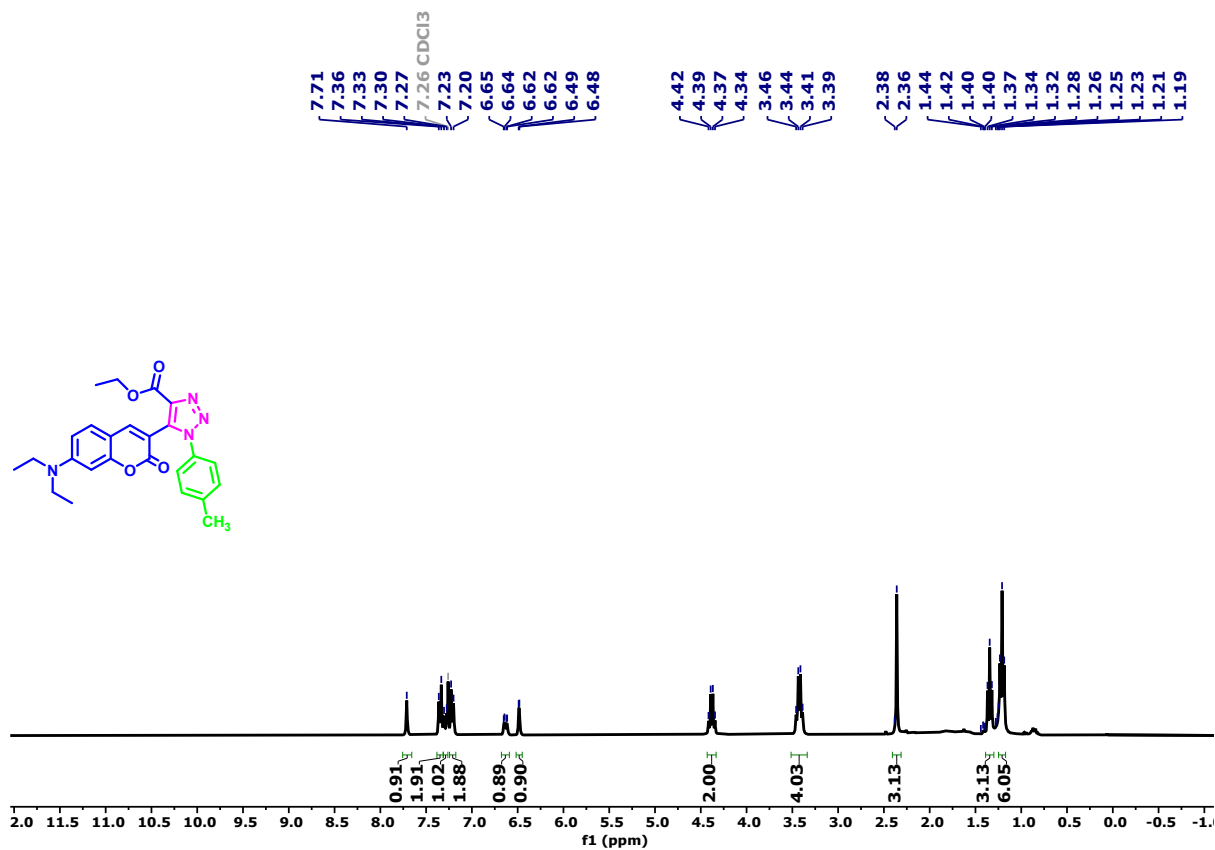

Fig. S7. <sup>1</sup>H NMR of compound 3c in CDCl<sub>3</sub> (300 MHz)

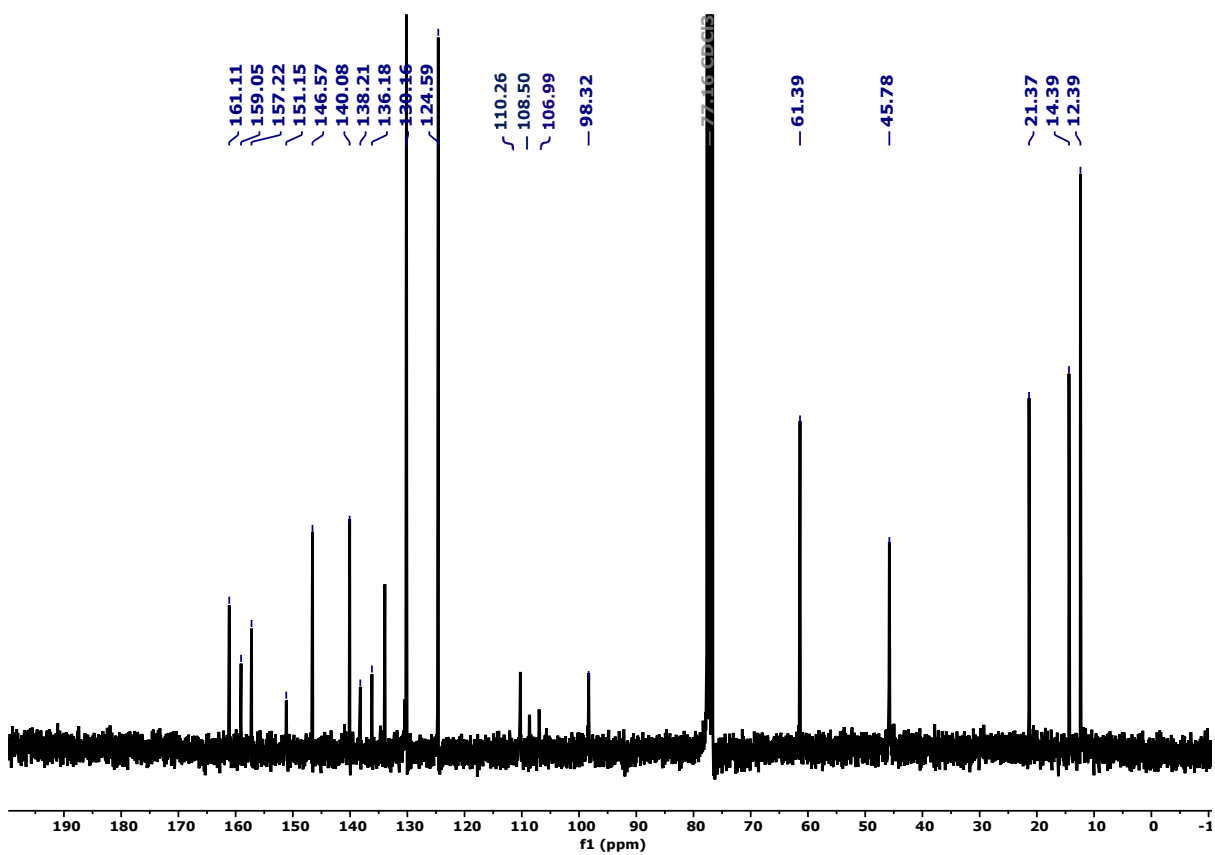

Fig. S8. <sup>13</sup>C NMR of compound 3c in CDCl<sub>3</sub> (75 MHz)

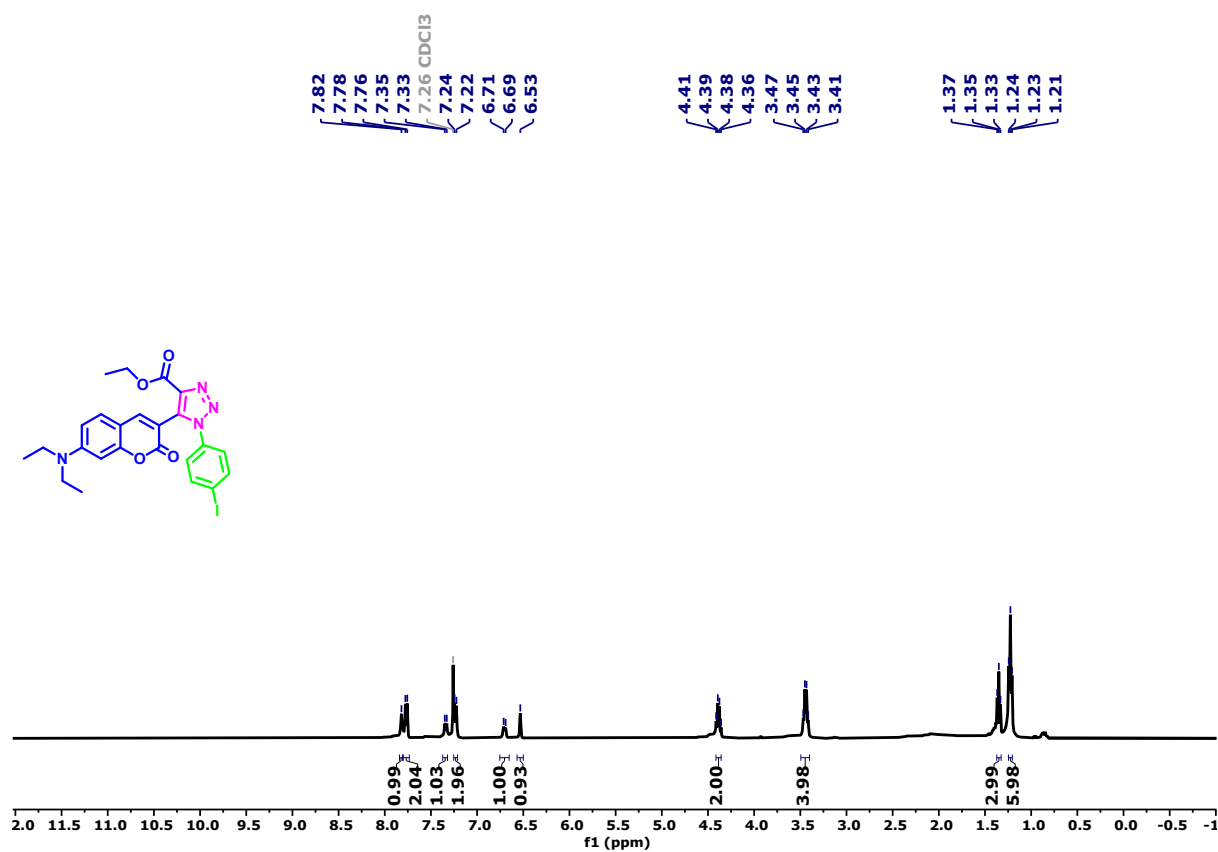

Fig. S9. <sup>1</sup>H NMR of compound **3d** in CDCl<sub>3</sub> (400 MHz)

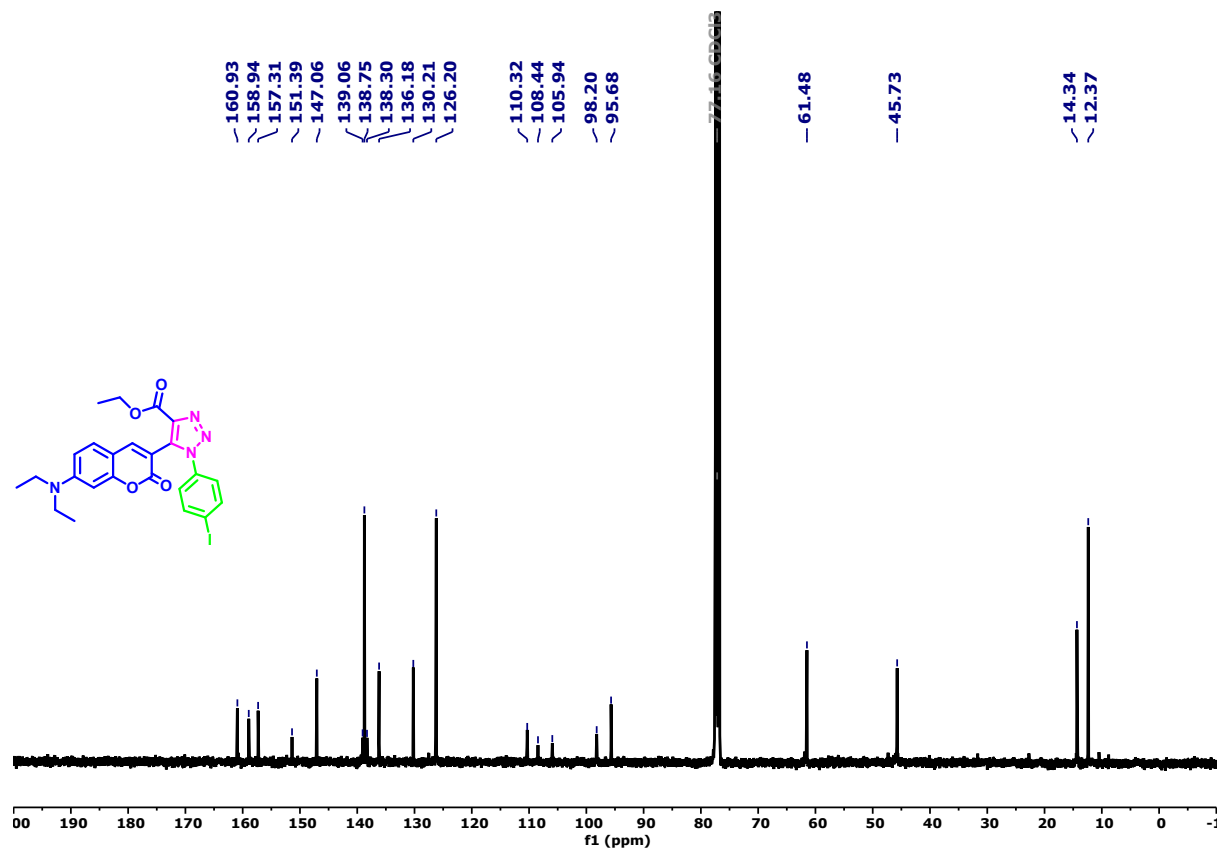

Fig. S10. <sup>13</sup>C NMR of compound **3d** in CDCl<sub>3</sub> (100 MHz)

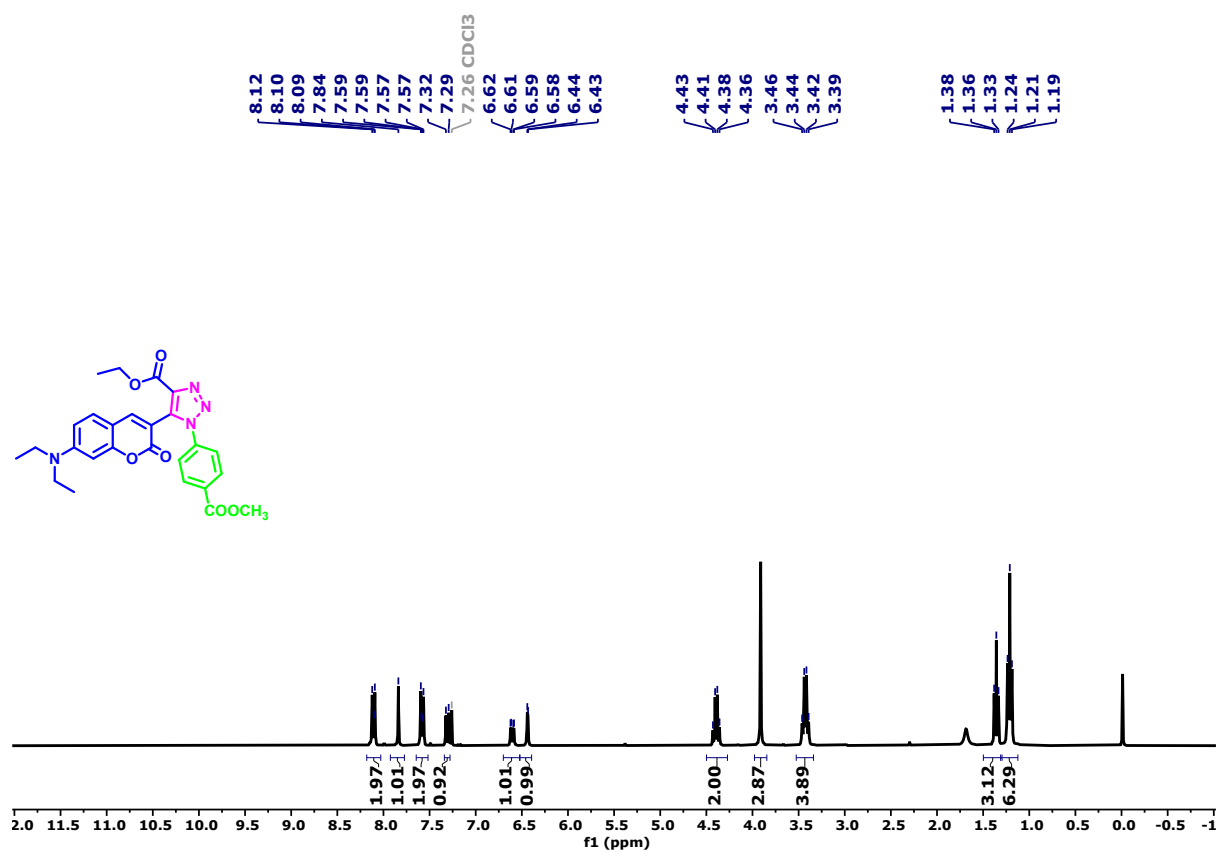

Fig. S11. <sup>1</sup>H NMR of compound 3e in CDCl<sub>3</sub> (300 MHz)

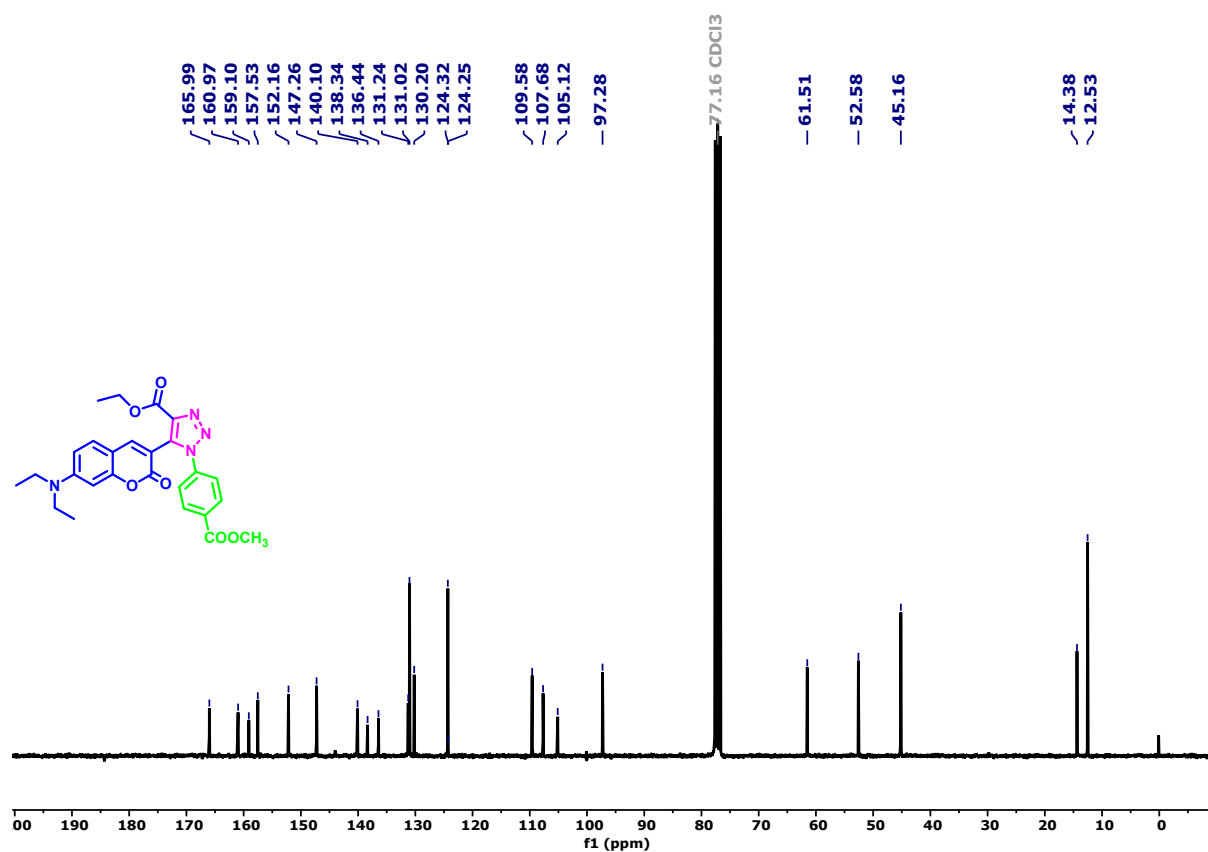

Fig. S12. <sup>13</sup>C NMR of compound 3e in CDCl<sub>3</sub> (75 MHz)

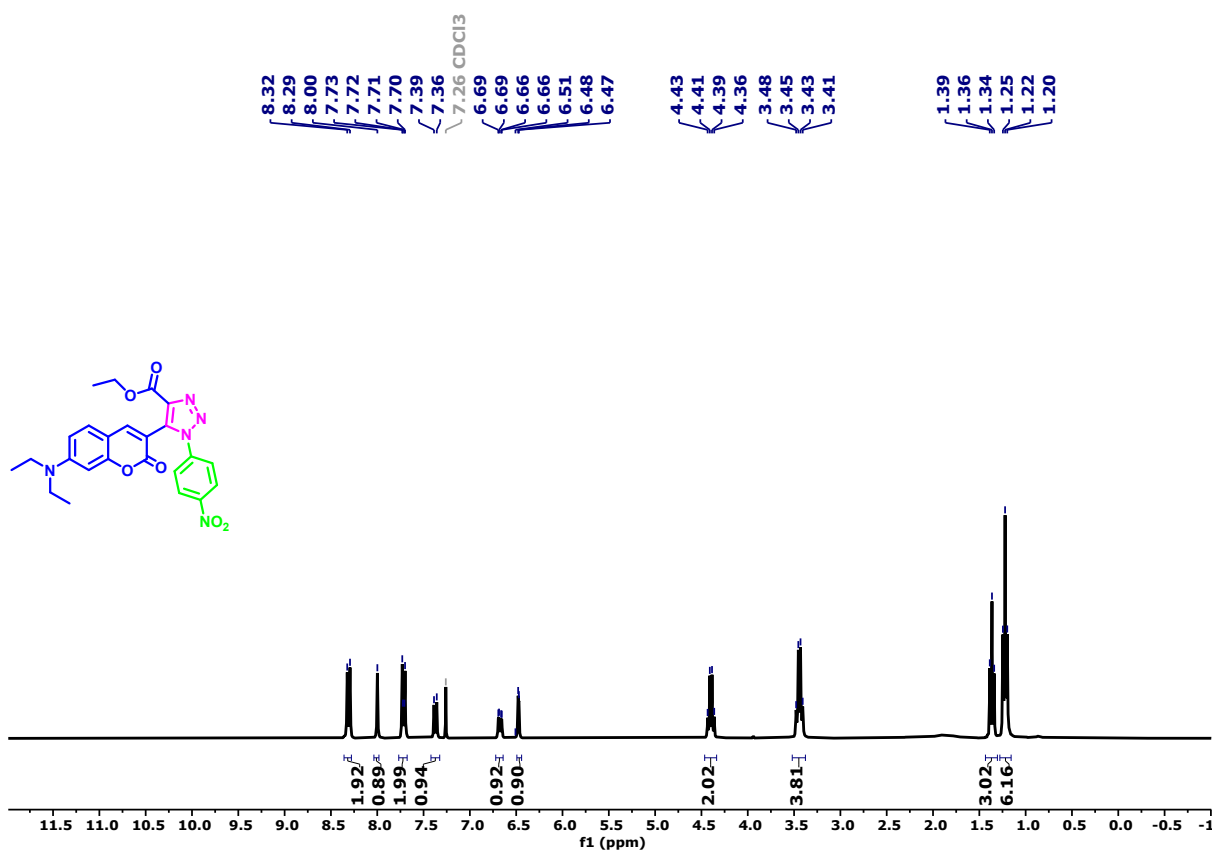

Fig. S13. <sup>1</sup>H NMR of compound **3f** in CDCl<sub>3</sub> (300 MHz)

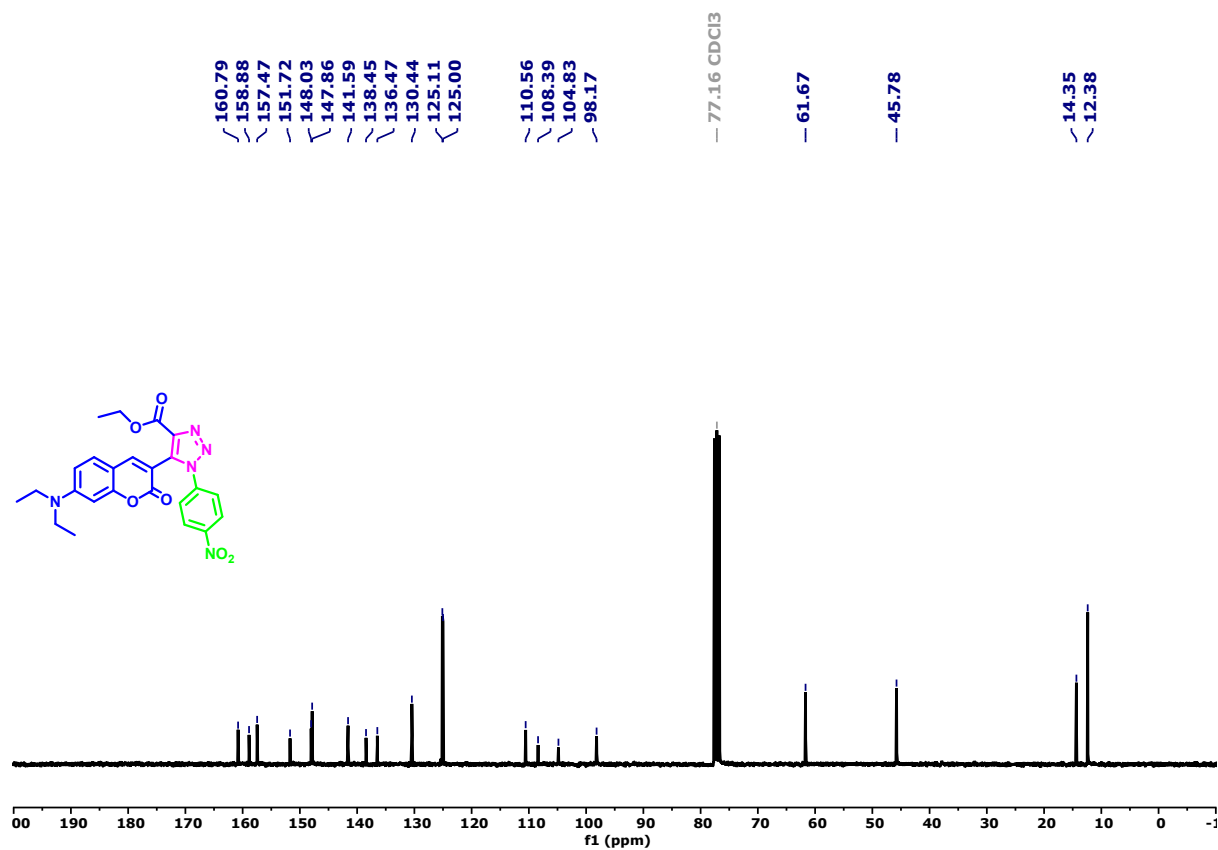

Fig. S14. <sup>13</sup>C NMR of compound **3f** in CDCl<sub>3</sub> (75 MHz)

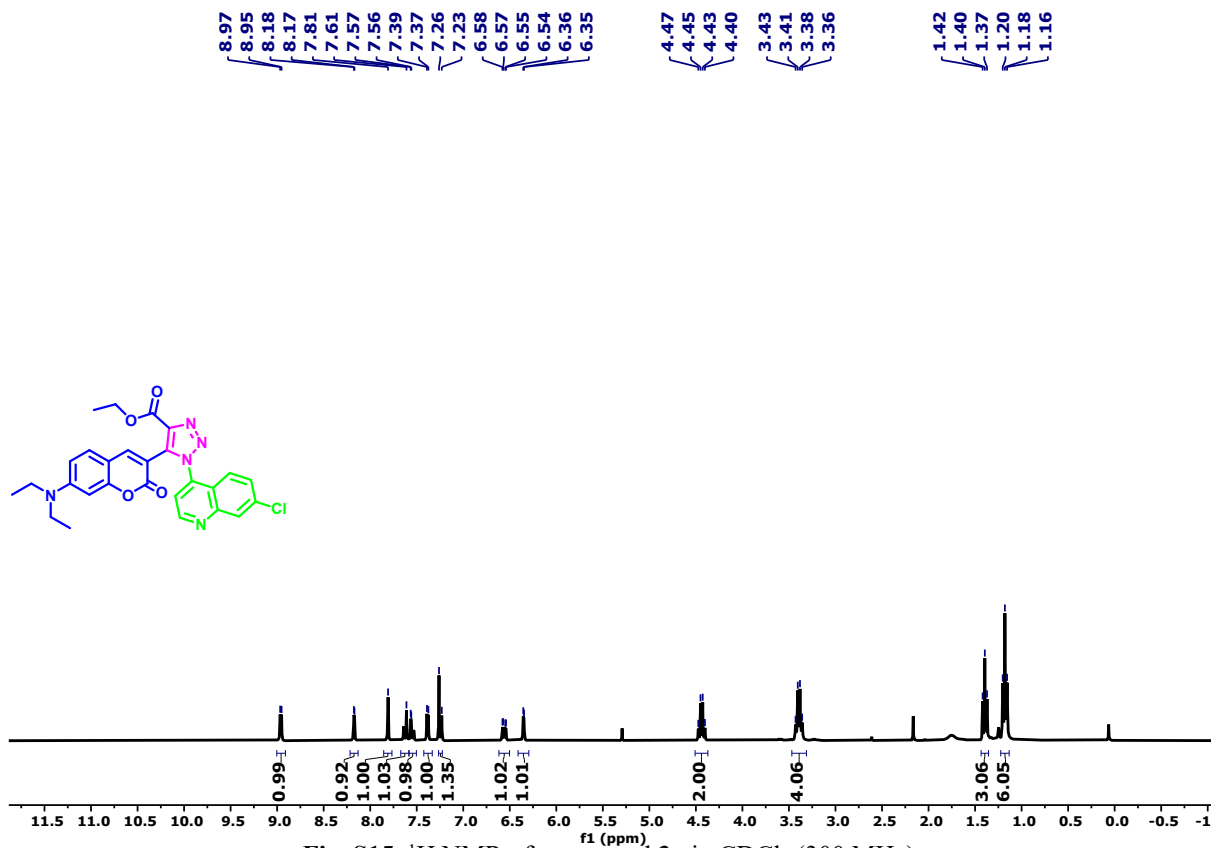

Fig. S15. <sup>1</sup>H NMR of compound 3g in CDCl<sub>3</sub> (300 MHz)

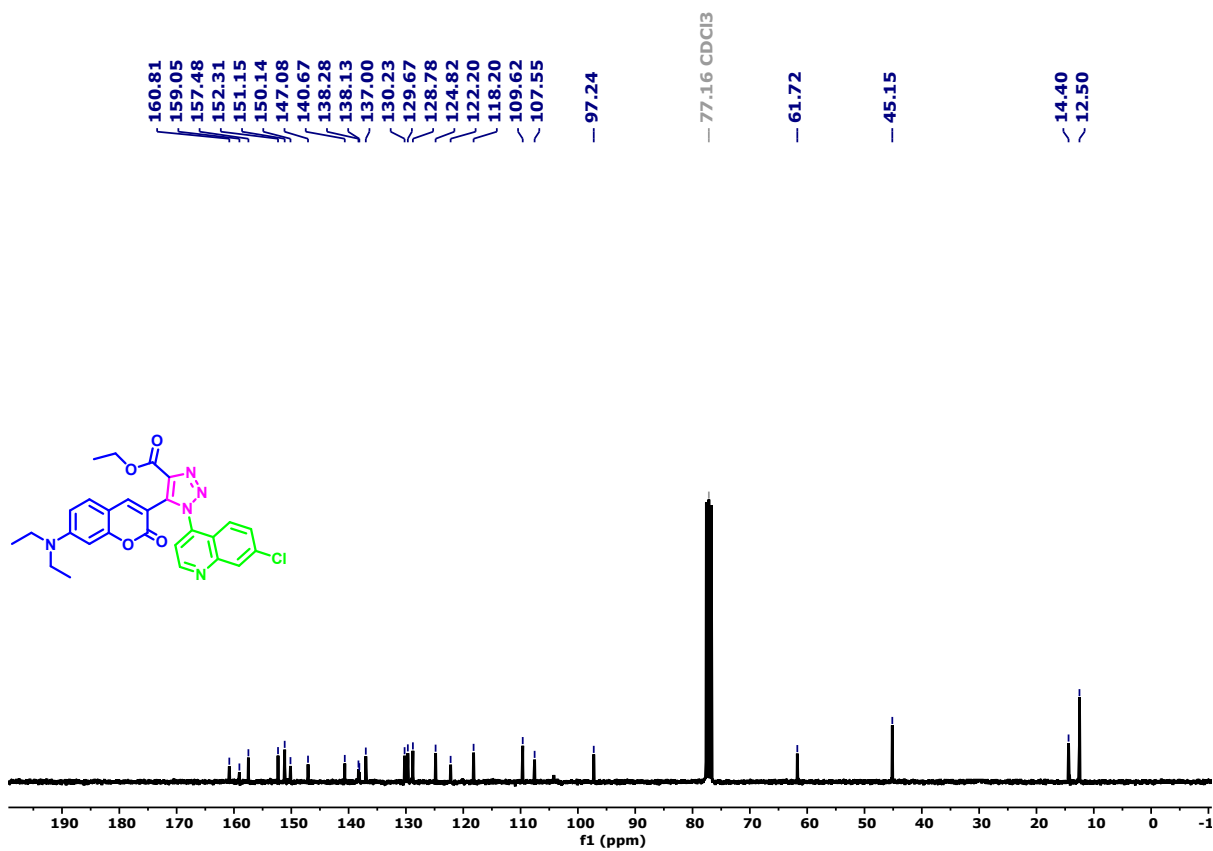

Fig. S16. <sup>13</sup>C NMR of compound 3g in CDCl<sub>3</sub> (75 MHz)

## 2. Photophysical Studies of the compounds (3a-e) and 3g

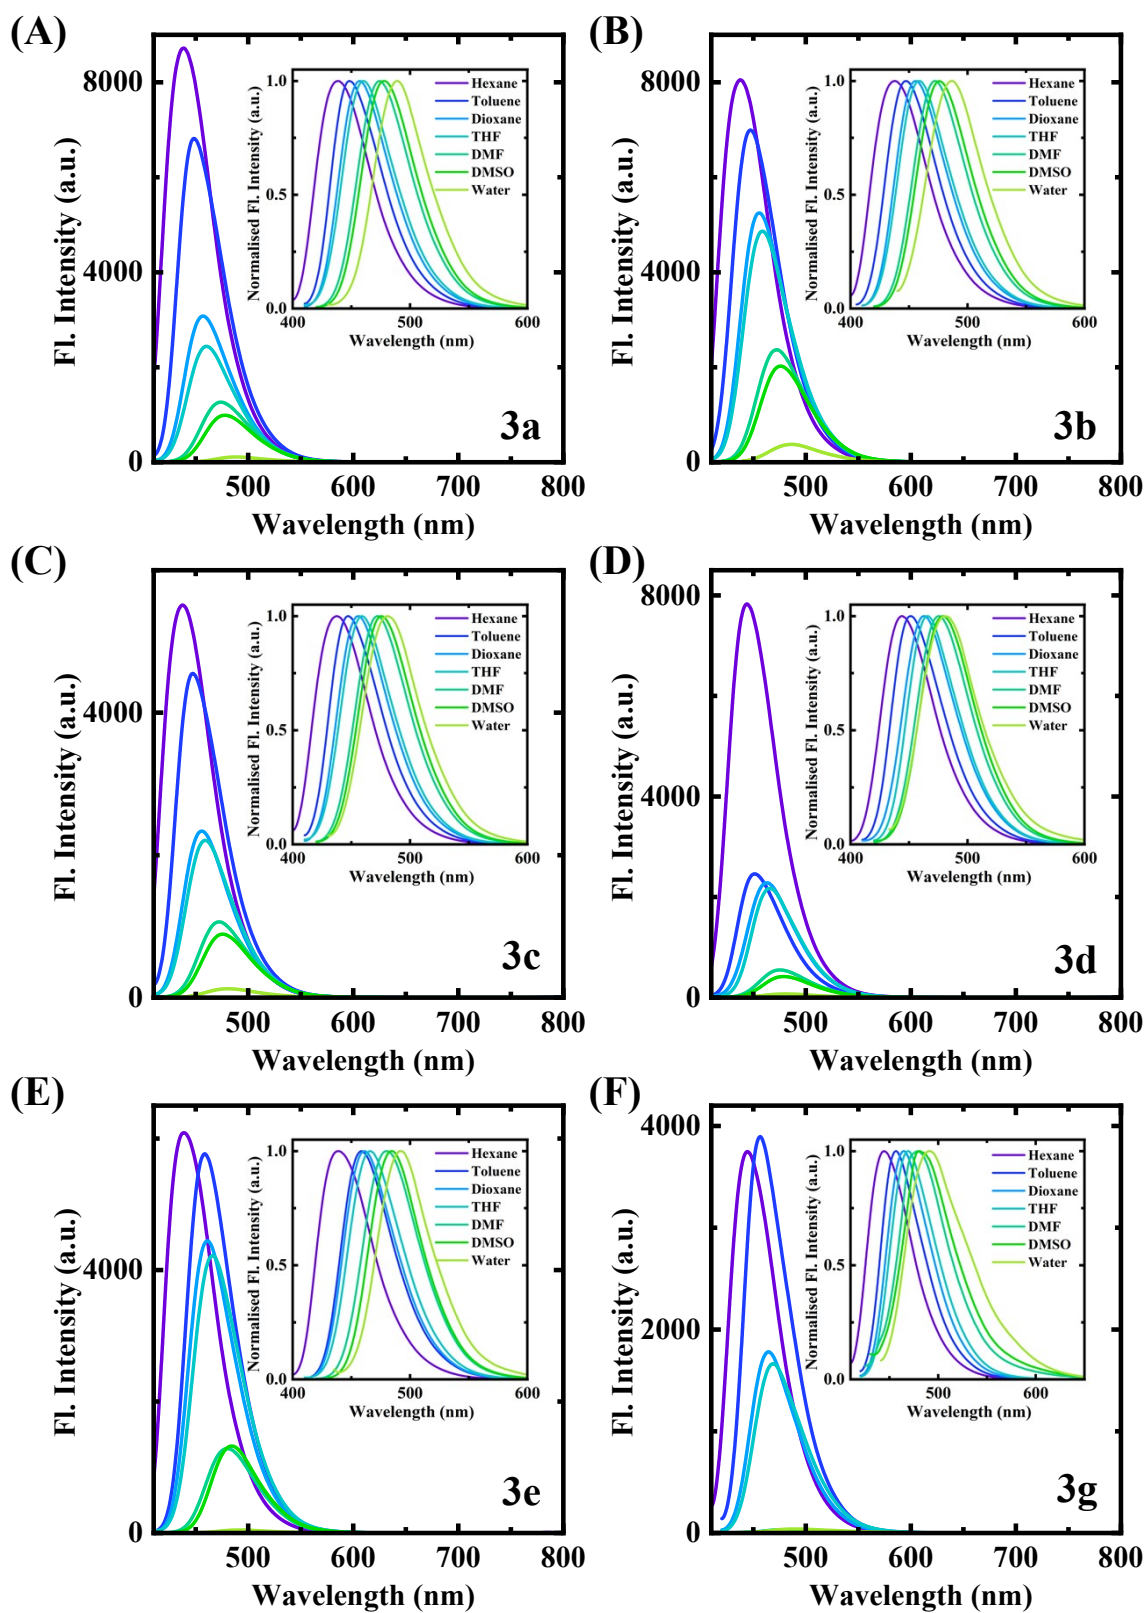

Fig. S17. Fluorescence emission spectra of compounds **3a-e** and **3g** in solvents of different polarities.

## 2. Absorption spectra of compounds (3a-e) and 3g

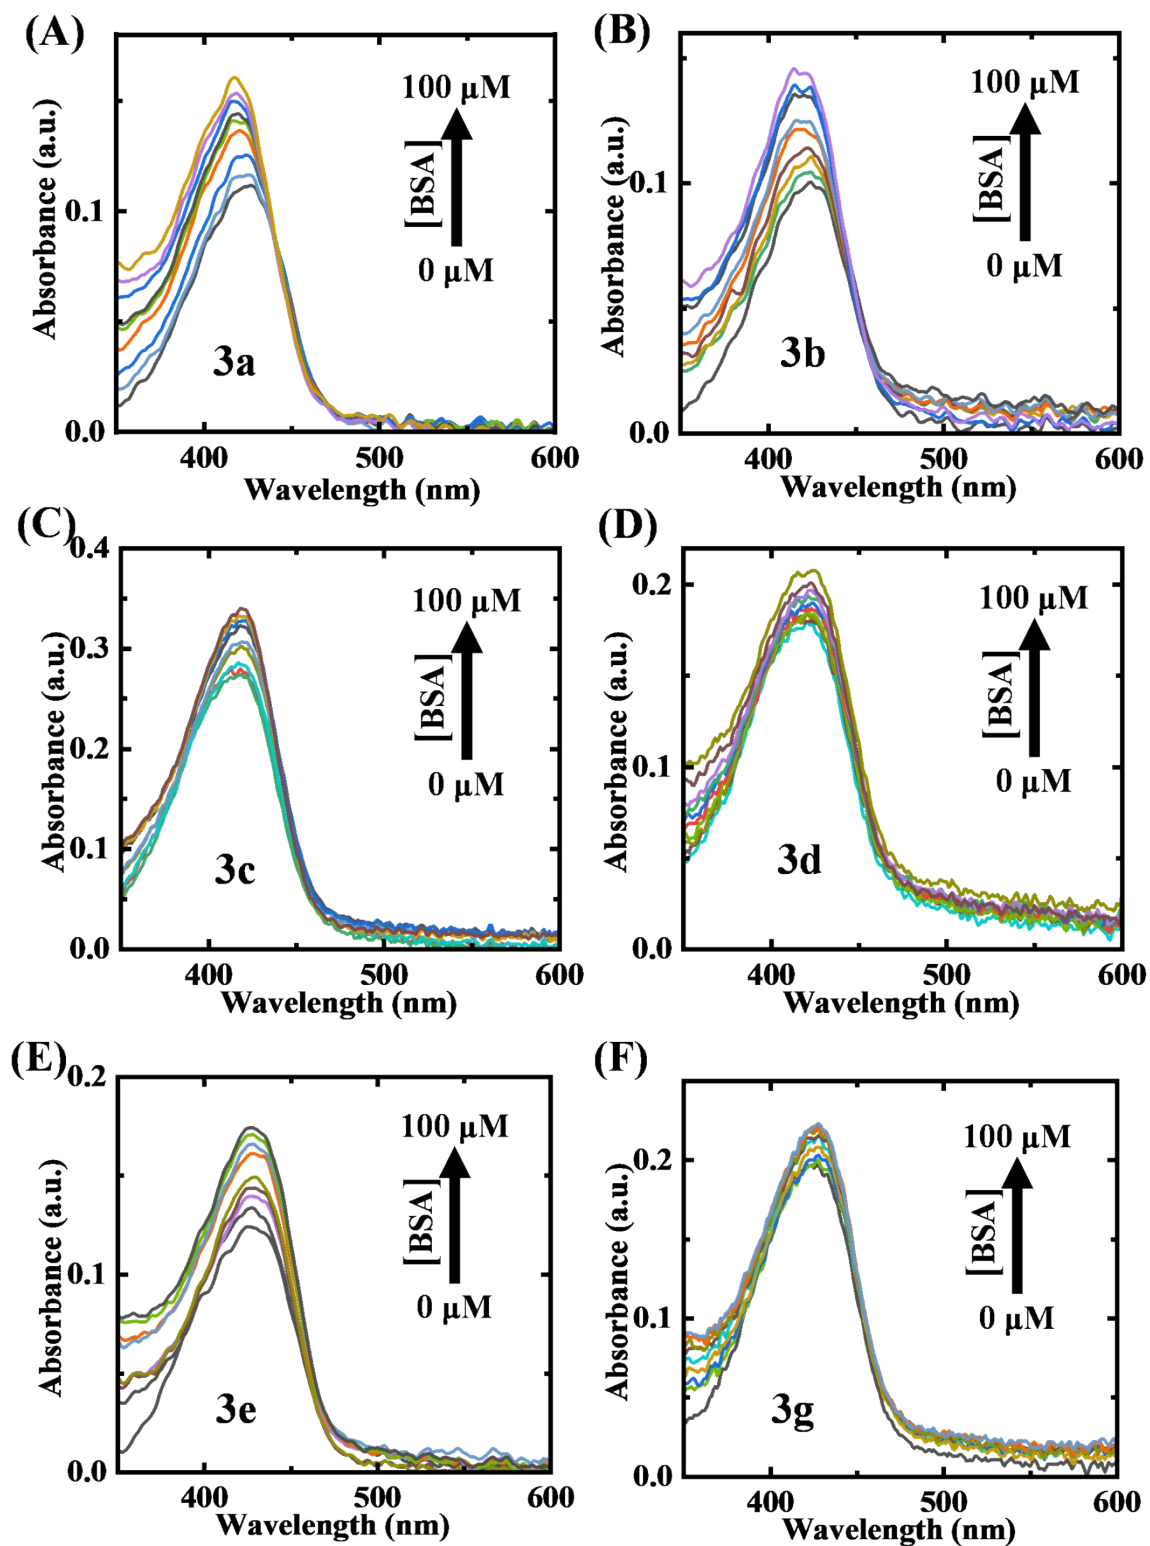

Fig. S18. Absorption spectra of compounds 3a-e and 3g upon addition of 1 to 100  $\mu\text{M}$  BSA.

### 3. Emission spectra of compounds (3a-e) and 3g

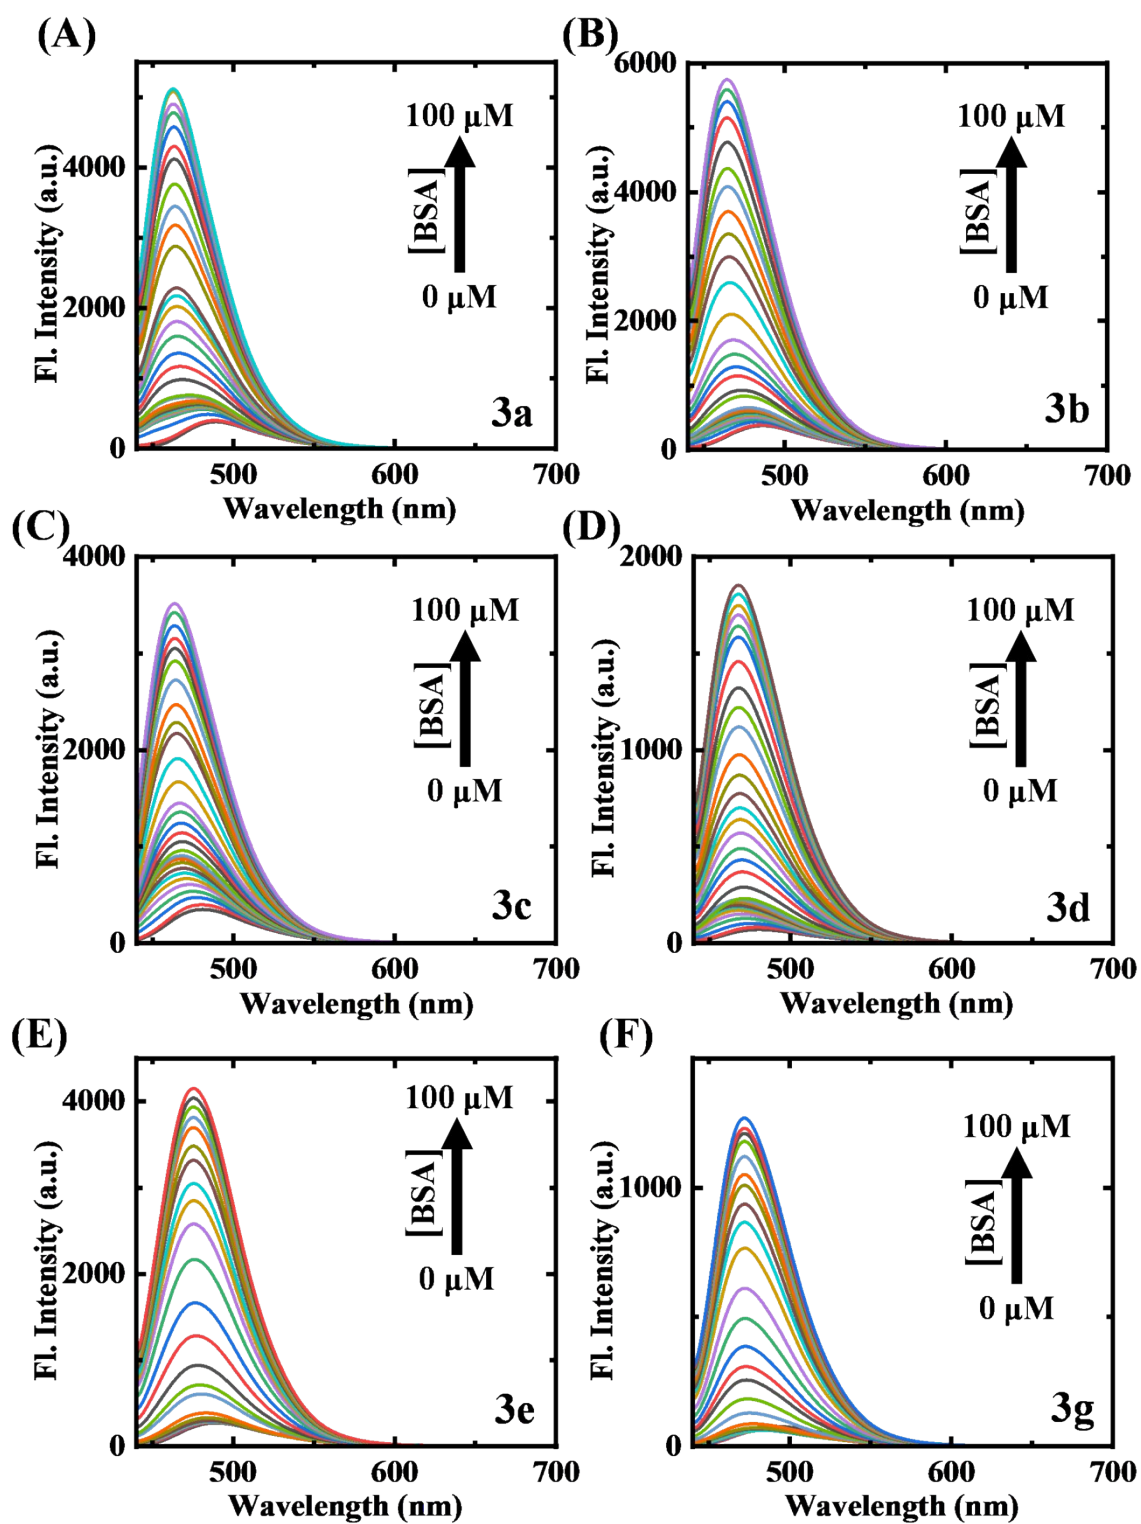

Fig. S19. Emission spectra of compounds 3a-e and 3g upon addition of 1 to 100  $\mu\text{M}$  BSA.

#### 4. Estimation of the binding constants of compounds (3a-e) and 3g

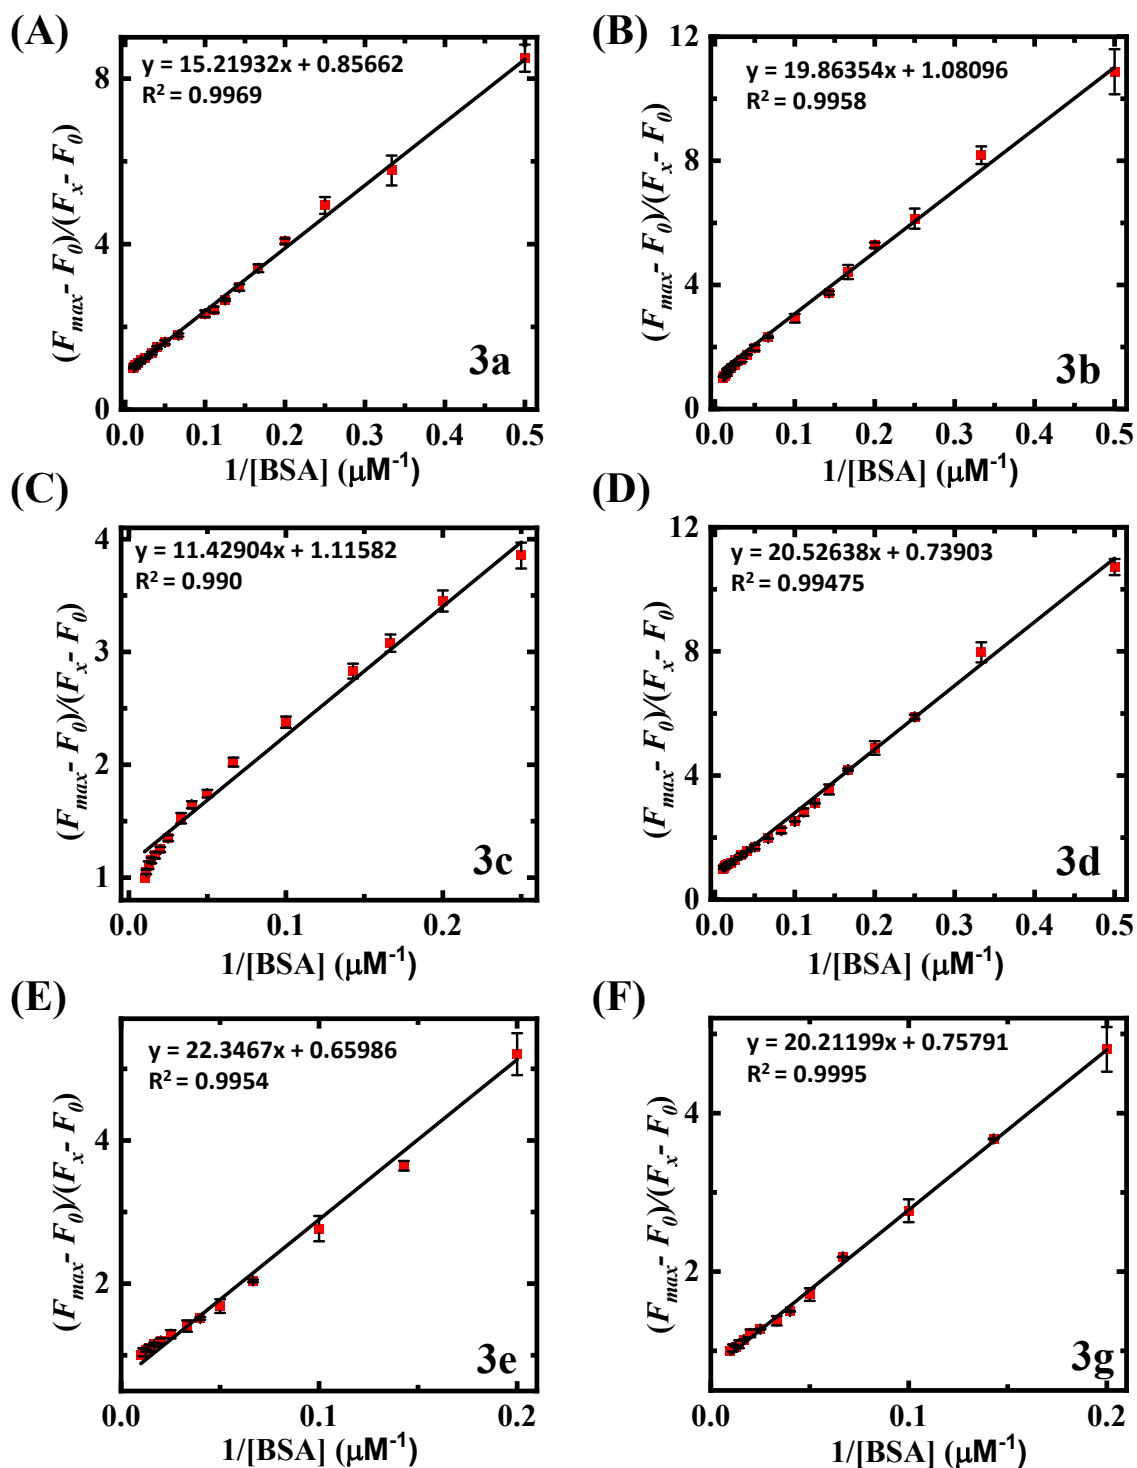

Fig. S20. Benesi-Hildebrand plot of compounds 3a-e and 3g upon addition of BSA. Error bars: ( $\pm$ SD, n=3).

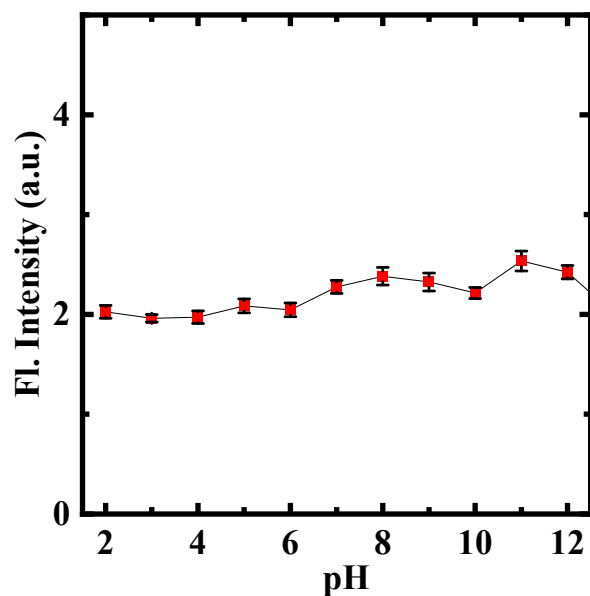

Fig. S21. Fluorescence intensity linear plot of probe 3f in pH range 2–12. Error bars: ( $\pm$ SD, n=3).

### 5. pH sensitivity of the probe 3f

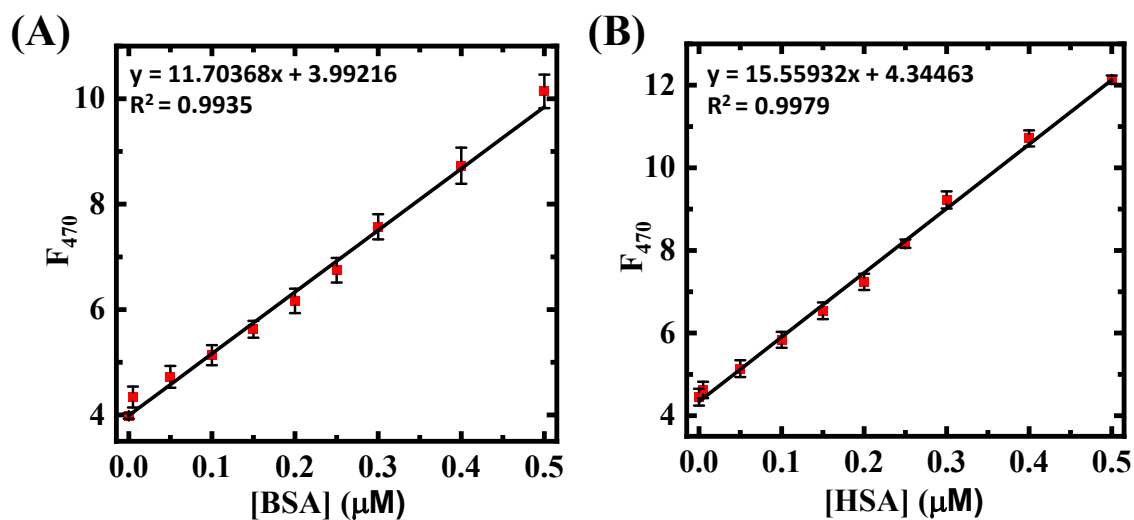

Fig. S22. (A) Linear plot of emission intensity vs. concentration of BSA and (B) concentration of HSA. Error bars: ( $\pm$ SD, n=3).

### 6. Limit of Detection of probe 3f for BSA and HSA sensing

### Calculation:

To determine the detection limit of **3f** for both BSA and HSA, fluorescence intensities of **3f** were recorded upon addition of 0 to 0.5  $\mu\text{M}$  BSA and HSA. Then the LOD value was calculated using the following equation

$$\text{LOD} = 3\sigma/s = 0.18 / (11.70 \times 10^{-6} \text{ M}^{-1}) = 15.4 \text{ nM}$$

where  $\sigma$  is the standard deviation of blank measurement, and  $s$  is the slope between the fluorescence emission intensity at 470 nm versus the concentration of BSA.

Similarly, for HSA,  $s = 15.57 \times 10^{-6} \text{ M}^{-1}$ , the LOD value calculated is 11.6 nM.

The limit of quantification (LOQ) values of **3f** for both BSA and HSA were also calculated by using the equation  $\text{LOQ} = 10\sigma/s$ . The LOQ values were found to be 51.3 nM and 38.6 nM, for BSA and HSA, respectively.

### 5. Table S1: Comparison with other small molecule donor- $\pi$ -acceptor probes for the detection of human serum albumins

| Sl. No. | Structure                                                                           | LOD                | Reference                                                     |
|---------|-------------------------------------------------------------------------------------|--------------------|---------------------------------------------------------------|
| 1.      | 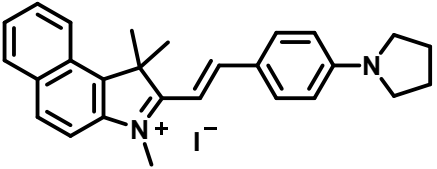 | 3.44 $\mu\text{M}$ | <i>J. Lumin.</i> , 2017, <b>192</b> , 478–485.                |
| 2.      |  | 18.1 nM            | <i>Sens. Actuators, B</i> , 2018, <b>271</b> , 82–89.         |
| 3.      |  | 4.8 nM             | <i>Spectrochim. Acta, Part A</i> , 2019, <b>223</b> , 117318. |
| 4.      |  | 30.9 $\mu\text{M}$ | <i>Spectrochim. Acta, Part A</i> , <b>2021</b> , 250, 119409. |

|     |                                                                                     |                    |                                                               |
|-----|-------------------------------------------------------------------------------------|--------------------|---------------------------------------------------------------|
| 5.  | 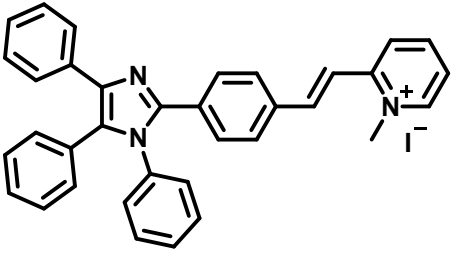   | 0.06 $\mu\text{M}$ | <i>Bioorg. Med. Chem. Lett.</i> , 2021, <b>53</b> , 128438.   |
| 6.  |    | 2.52 $\mu\text{M}$ | <i>Anal. Chim. Acta</i> , 2022, <b>1190</b> , 339267.         |
| 7.  |    | 3.5 $\mu\text{M}$  | <i>Chin. Chem. Lett.</i> , 2023, <b>34</b> , 107557.          |
| 8.  |  | 2.39 nM            | <i>J. Mater. Chem. B</i> , 2024, <b>12</b> , 8791.            |
| 9.  |  | 0.24 $\mu\text{M}$ | <i>Chem Asian J.</i> , 2024, <b>19</b> , e202301055           |
| 10. |  | 14.7 nM            | <i>Spectrochim. Acta, Part A</i> , 2026, <b>352</b> , 127503. |
| 11. |  | 0.97 $\mu\text{M}$ | <i>Biosens. Bioelectron.</i> , 2026, <b>301</b> , 118490.     |

|     |                                                                                   |              |                                                    |
|-----|-----------------------------------------------------------------------------------|--------------|----------------------------------------------------|
| 12. | 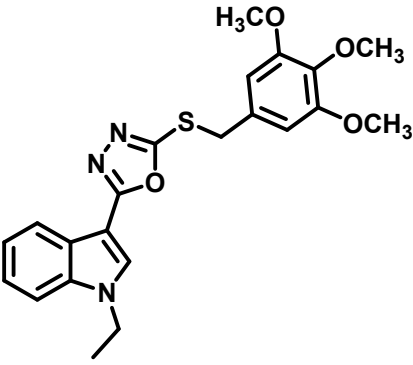 | 0.47 $\mu$ M | <i>Anal. Biochem.</i> , 2026, <b>713</b> , 116090. |
| 13. |  | 11.6 nM      | <i>This work</i>                                   |

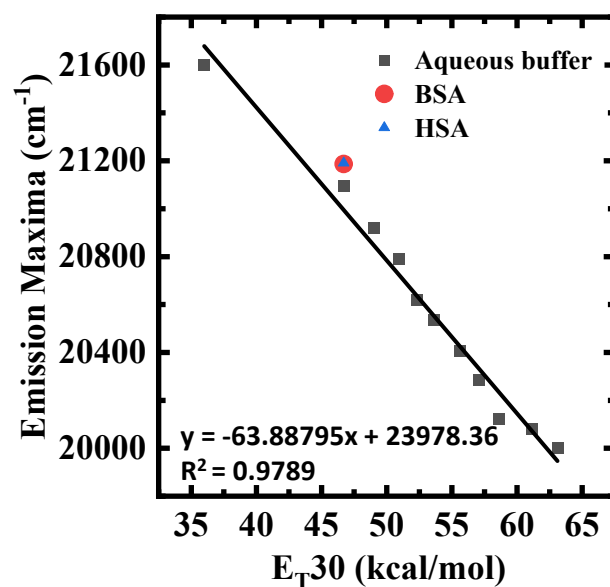

**Fig. S23.** Variation of energy corresponds to the emission maxima of **3f** as a function of  $E_T(30)$  in a water-dioxan mixture. The interpolated value corresponds to the **3f** in the BSA (blue) and HSA (red) environment.

## 7. Micropolarity Analysis of Probe **3f** within the Protein Binding Pocket

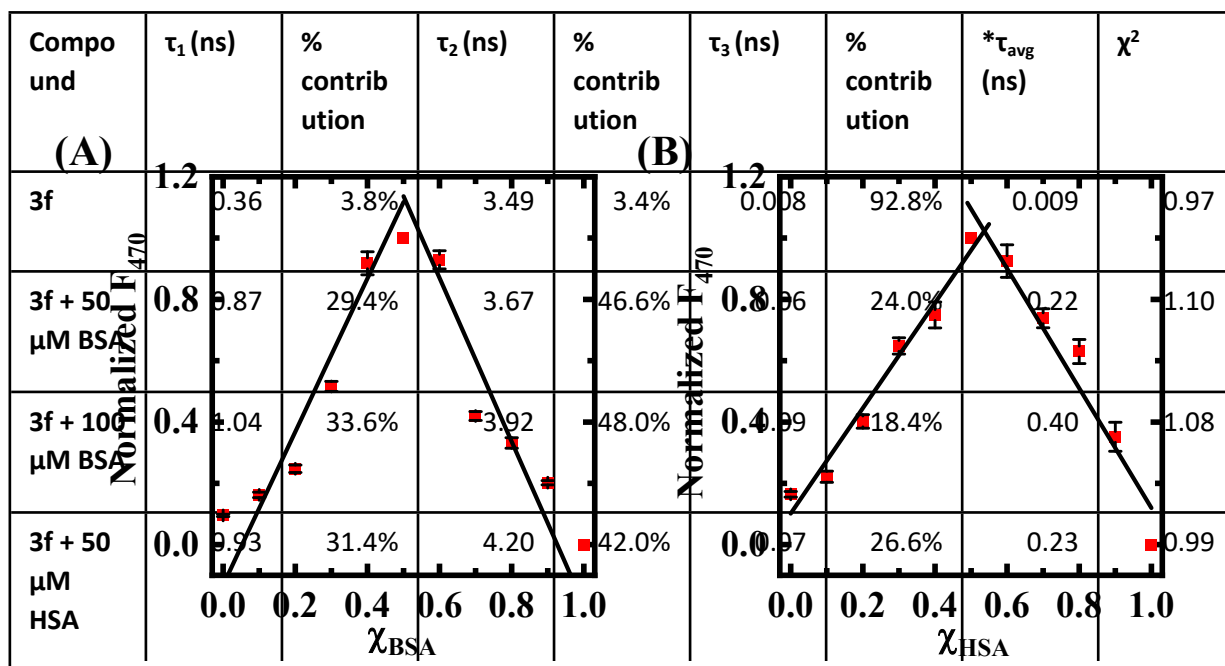

Fig. S24. Job's plot based on fluorescence intensity at 470 nm for total concentration 20  $\mu$ M of (A) 3f-BSA and (B) 3f-HSA in a buffer containing 10 mM  $\text{Na}_2\text{HPO}_4$  (pH = 7.4) at 25  $^\circ\text{C}$ . Error bars: ( $\pm$ SD, n=3).

## 8. Job's plot for BSA and HSA

## 9. Table S2: Time-resolved fluorescence analysis decay parameters of 3f in absence and presence of BSA and HSA

|                                |      |       |      |       |       |       |      |      |
|--------------------------------|------|-------|------|-------|-------|-------|------|------|
| <b>3f + 100<br/>μM<br/>HSA</b> | 1.33 | 39.0% | 4.83 | 35.7% | 0.124 | 25.3% | 0.42 | 0.95 |
| *Estimated errors within ±5%.  |      |       |      |       |       |       |      |      |

**10. Table S3: Secondary structure analysis (infrared spectra) for the free BSA and HSA and their corresponding complexes with 3f**

| Amide I (cm <sup>-1</sup> )<br>components | BSA (500 μM)     | BSA+ 3f (500μM+<br>500μM) | HSA<br>(500 μM)  | HSA + 3f<br>(500μM+ 500μM) |
|-------------------------------------------|------------------|---------------------------|------------------|----------------------------|
| α-helix<br>1650–1660                      | 54% (1650)       | 38% (1650)                | 62% (1650)       | 43% (1650)                 |
| β-sheet<br>1614–1637                      | 17% (1614, 1623) | 14% (1613, 1624)          | 19% (1611, 1624) | 15% (1613, 1623)           |
| random coil<br>1638–1648                  | 10% (1640)       | 28% (1640)                | 8% (1640)        | 27% (1640)                 |
| β-turn<br>1660–1680                       | 16% (1675)       | 14% (1675)                | 9% (1678)        | 10% (1675)                 |
| β-antiparallel<br>1680–1692               | 5% (1687)        | 6% (1688)                 | 2% (1690)        | 5% (1688)                  |

**11. Table S4: Comparison of α-helix content from FT-IR and CD spectroscopy**

| Compound              | % α-helix (FT-IR) | % α-helix (CD) |
|-----------------------|-------------------|----------------|
| <b>BSA</b>            | 54%               | 56%            |
| <b>BSA + 3f (1:1)</b> | 38%               | 39%            |
| <b>HSA</b>            | 62%               | 61%            |
| <b>HSA + 3f (1:1)</b> | 43%               | 44%            |

## 12. Site-Marker Study

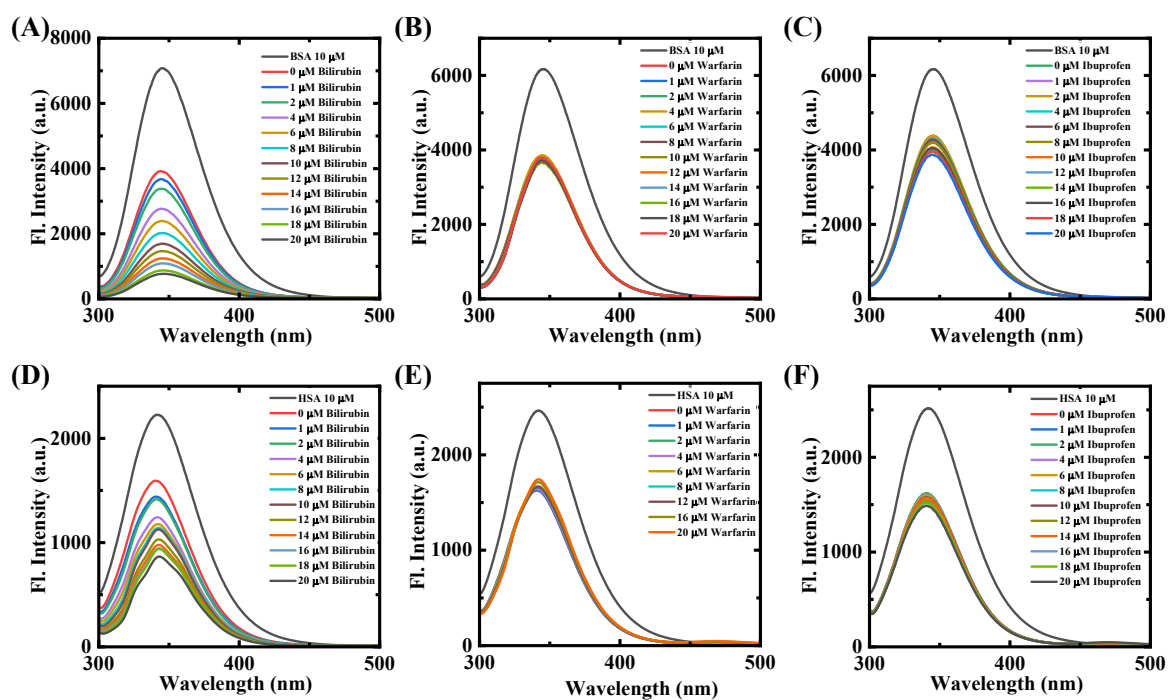

**Fig. S25.** Emission intensity of the 10 $\mu$ M [BSA-3f] complex and [HSA-3f] complex in the presence of increasing concentration of the bilirubin (A, D), warfarin (B, E), ibuprofen (C, F) [0-20  $\mu$ M, (0-2eq)] in a buffer containing 10 mM Na<sub>2</sub>HPO<sub>4</sub> (pH = 7.4) at 25 °C.  $\lambda_{\text{ex}}$  = 290 nm

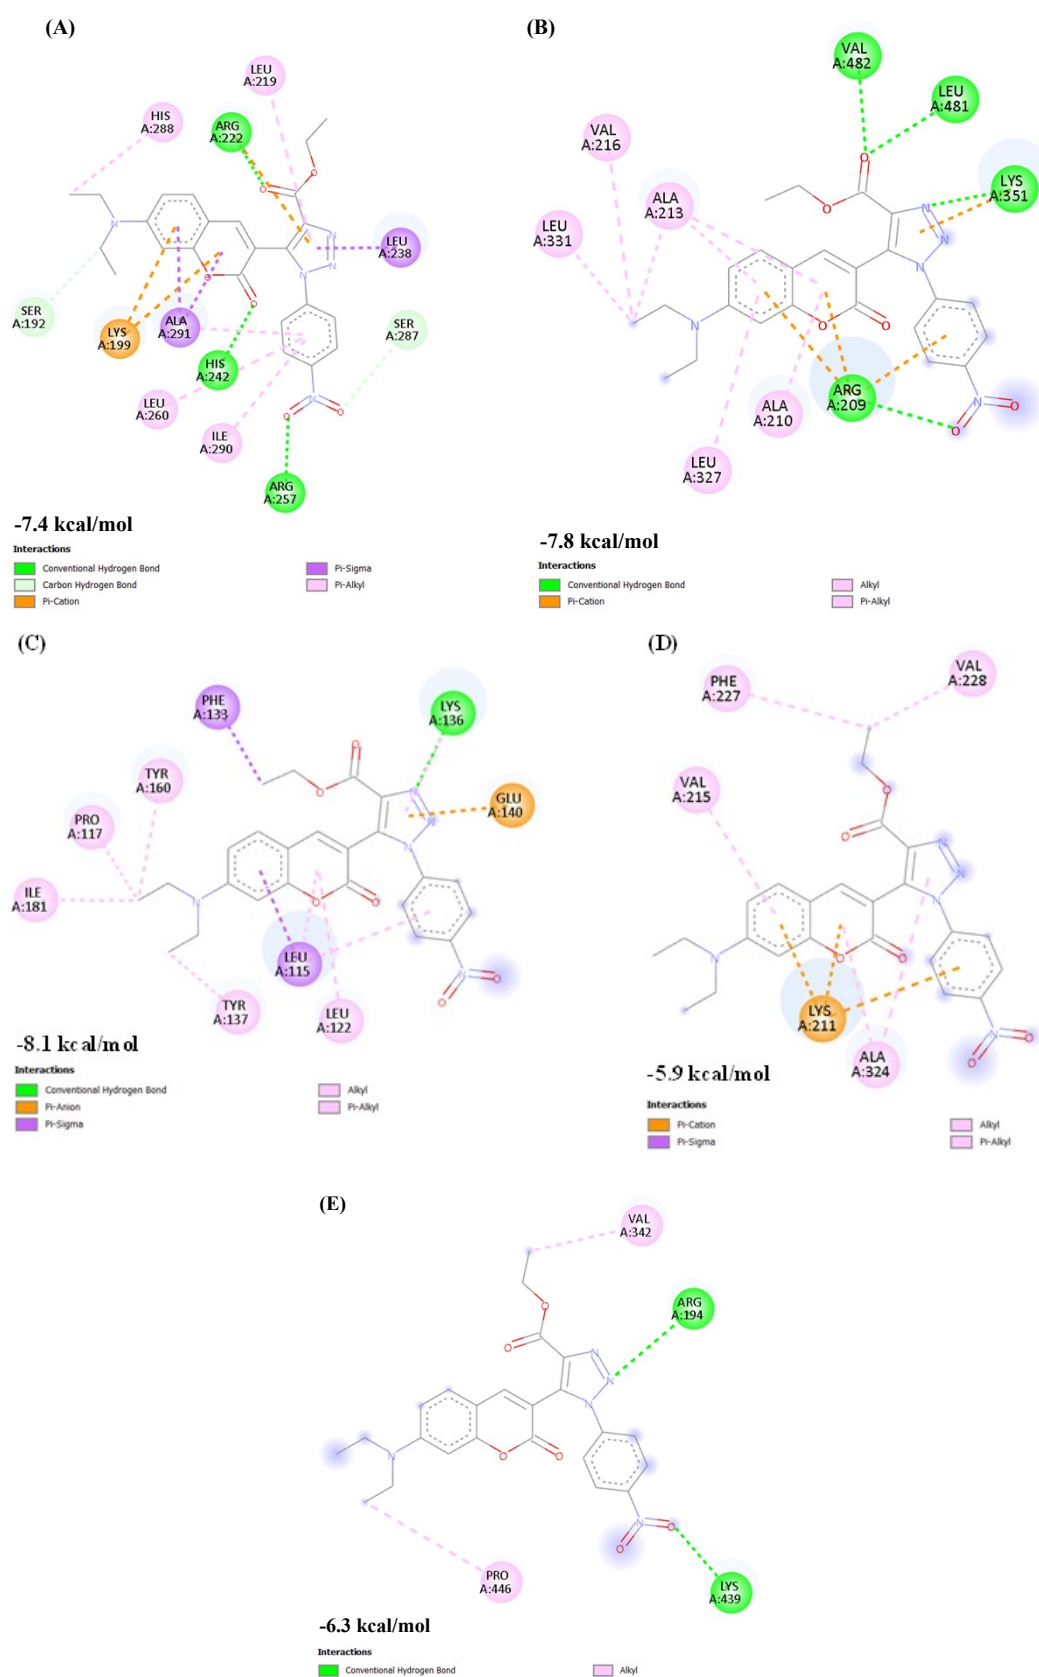

**Fig. S26.** 2-D view of amino acid residues surrounding **3f** for HSA (A) subdomain IIA (warfarin site) (PDB ID: 2BXD), (B) subdomain IIIA (ibuprofen site) (PDB ID: 2BXG), and for BSA (PDB ID: 4F5S) (C) subdomain IB (bilirubin site) (D) subdomain IIA (warfarin site), (E) subdomain IIIA (ibuprofen site).

### 13. Molecular Docking Study

14. Table S5: Amino acid residue involved in the ligand-protein interaction and free binding energy

| Receptor | Pocket location | Binding affinity of the best docked pose (kcal/mol) | Interacting protein residues                                                                   | Nature of interaction                                   |
|----------|-----------------|-----------------------------------------------------|------------------------------------------------------------------------------------------------|---------------------------------------------------------|
| HSA      | Subdomain IB    | -9.8                                                | LEU115, ARG117, PRO118, ILE142, ARG145, PHE149, LEU185, ARG 186                                | H-bond, Alkyl, $\pi$ -Alkyl, $\pi$ -Sigma               |
|          | Subdomain IIA   | -7.4                                                | SER192, LYS199, LEU219, ARG222, LEU238, HIS242, ARG257, LEU260, SER287, HIS288, ILE290, ALA291 | H-bond, $\pi$ -Cation, $\pi$ -Alkyl, $\pi$ -Sigma       |
|          | Subdomain IIIA  | -7.8                                                | ARG209, ALA210, ALA213, VAL216, LEU327, LEU331, LYS351, LEU481, VAL482                         | H-bond, Alkyl, $\pi$ -Cation, $\pi$ -Alkyl              |
| BSA      | Subdomain IB    | -8.1                                                | LEU115, PRO117, LEU122, PHE133, LYS136, TYR137, GLU140, TYR160, ILE181                         | H-bond, Alkyl, $\pi$ -anion, $\pi$ -Alkyl, $\pi$ -Sigma |
|          | Subdomain IIA   | -5.9                                                | LYS211, VAL215, PHE227, VAL228, ALA324                                                         | $\pi$ -Cation, $\pi$ -Alkyl, $\pi$ -Sigma, $\pi$ -Alkyl |
|          | Subdomain IIIA  | -6.3                                                | ARG194, VAL342, LYS439, PRO446                                                                 | H-bond, Alkyl                                           |

## 15. HSA detection in a real urine sample and paper strip experiment

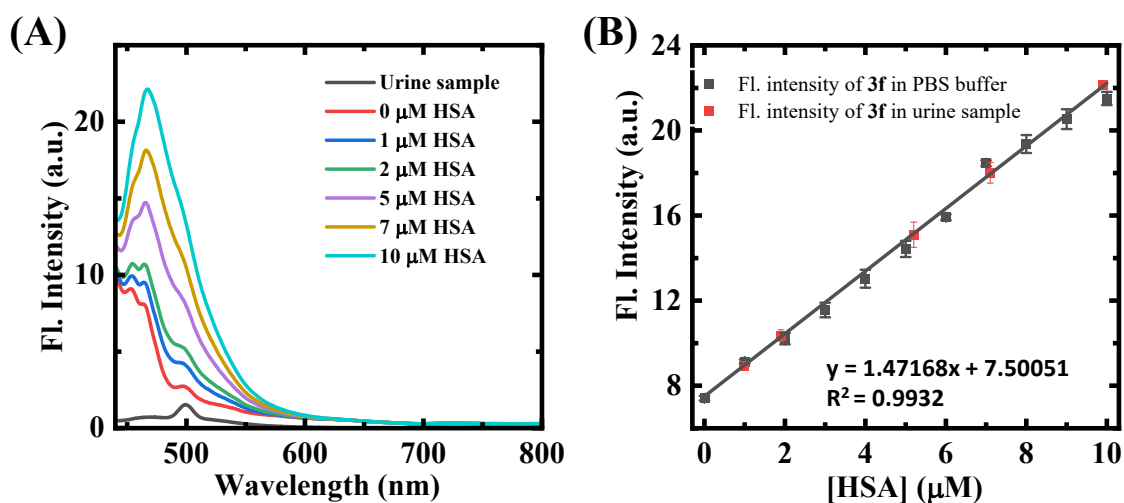

**Fig. S27.** (A) Emission intensity of **3f** (20 μM,  $\lambda_{ex} = 425$  nm) upon addition of HSA (0-10 μM) in diluted urine (50-fold dilution) in phosphate buffer solution (pH = 7.4) at 25°C; (B) Calibration plot of emission intensity of **3f** with HSA concentration added in a buffer containing 10 mM  $\text{Na}_2\text{HPO}_4$  (pH = 7.4) at 25°C. Error bars: ( $\pm$ SD, n=3).

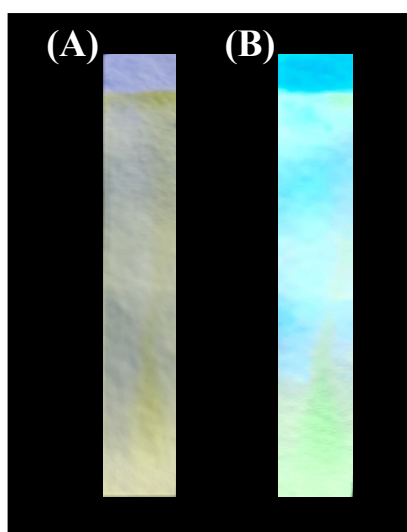

**Fig. S28.** (A) **3f**-coated filter paper treated with blank diluted urine sample; (B) **3f**-coated filter paper treated with HSA-spiked diluted urine sample in a buffer containing 10 mM  $\text{Na}_2\text{HPO}_4$  (pH = 7.4) at 25 °C.
